# Supplementary material for: Ice nucleators have shorter persistence in the atmosphere thanother airborne bacteria
Source: Copernicus journal article supplement (doi:10.5194/bg-2016-496), 2016-11-24
Supplement: Supplementary file 1 [file BG_supplementary_EmilianoStopelli.pdf › BG_supplementary_EmilianoStopelli.pdf]

## *Supplement of*

# **Ice nucleators have shorter persistence in the atmosphere than other airborne bacteria**

Emiliano Stopelli<sup>1</sup>, Franz Conen<sup>1</sup>, Caroline Guilbaud<sup>2</sup>, Jakob Zopfi<sup>3</sup>, Christine Alewell<sup>1</sup>, Cindy E. Morris<sup>2</sup>

<sup>1</sup>Environmental Geosciences, University of Basel, 4056 Basel, Switzerland

<sup>2</sup>INRA PACA, UR 0407 Plant Pathology Research Unit, 84143 Montfavet, France

<sup>3</sup>Acquatic and Stable Isotope Biogeochemistry, University of Basel, 4056 Basel, Switzerland

*Correspondence to:* Emiliano Stopelli (emiliano.stopelli@unibas.ch) and Franz Conen (franz.conen@unibas.ch)

**Supplemental Figure 1.** Neighbour joining phylogenetic tree of the strains of *P. syringae* isolated from Jungfrauoch, constructed on the basis of partial sequences of the citrate synthase housekeeping gene (*cts*) and comparison with *P. syringae* reference strains. More information is provided in section 2.2 of the article.

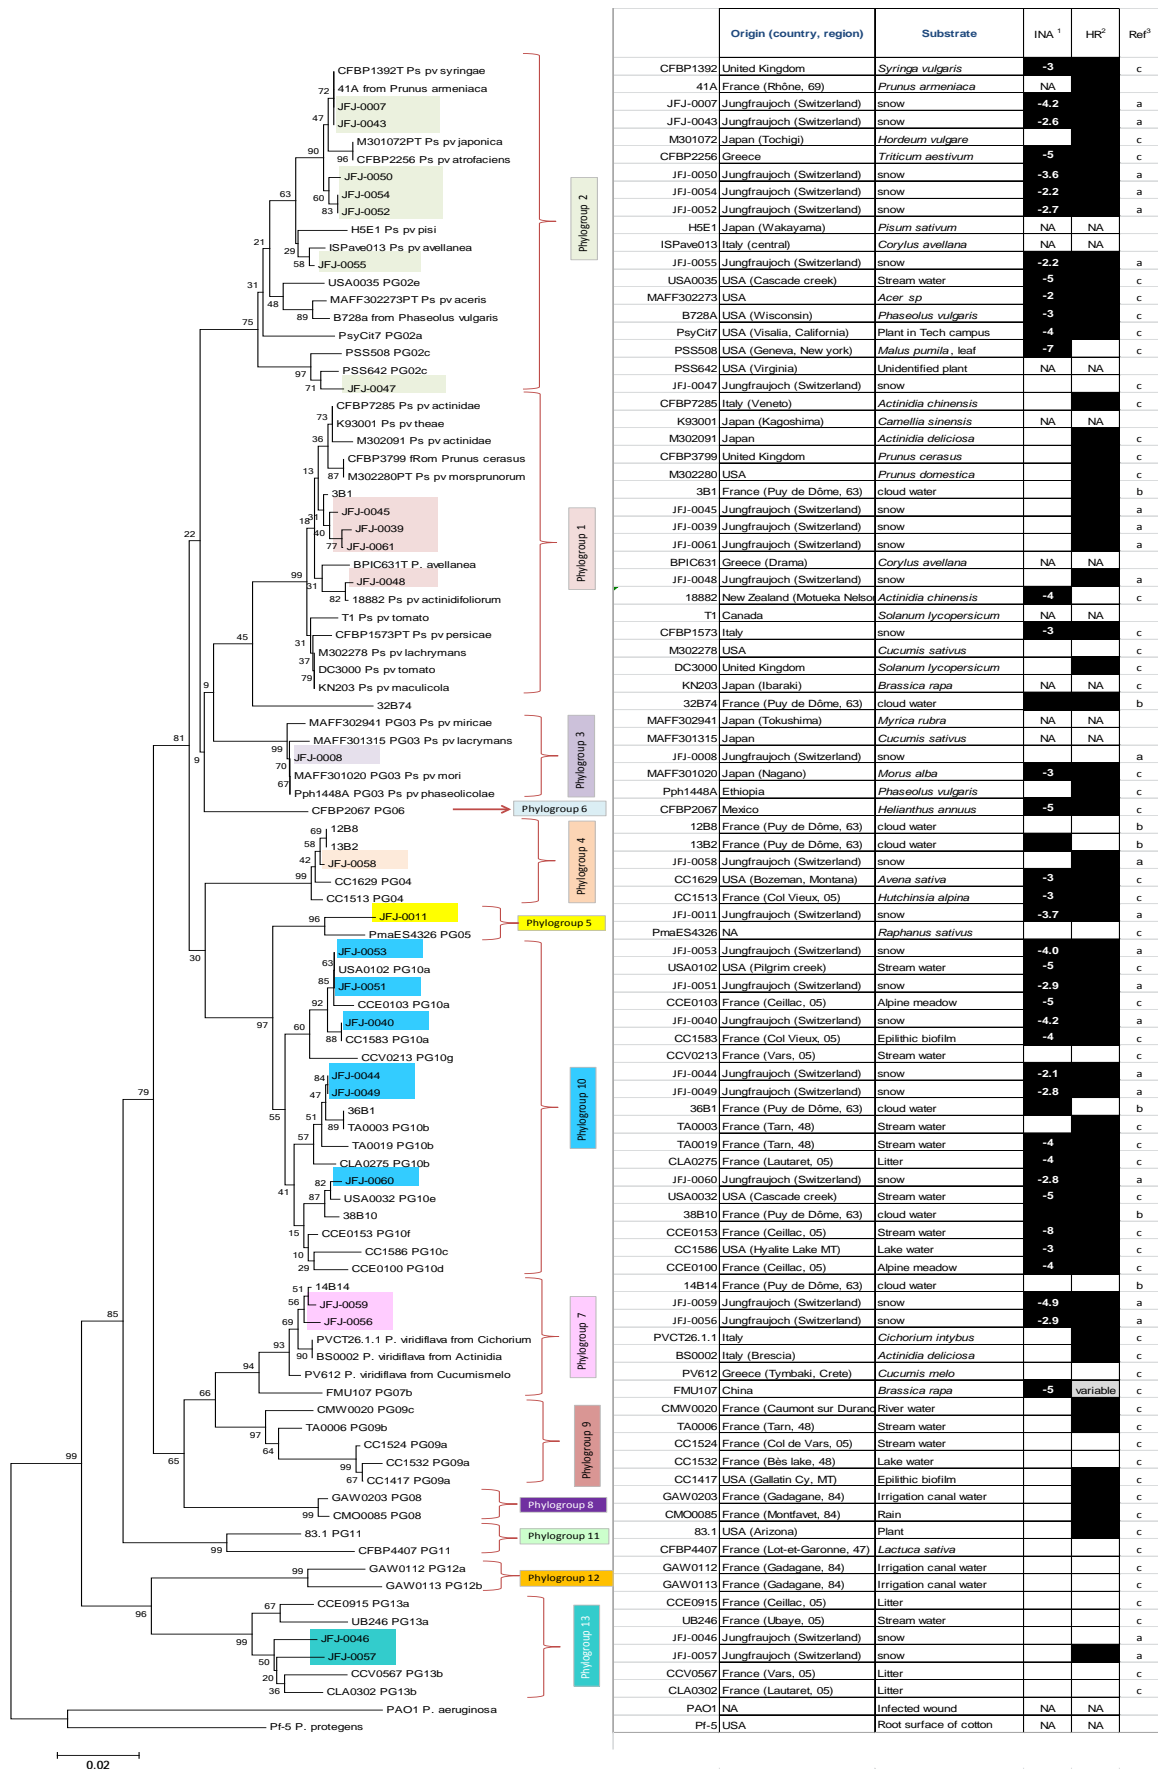

|                   |          |
|-------------------|----------|
| positive reaction |          |
| negative reaction |          |
| No data           | NA       |
| variable          | variable |

<sup>1-3</sup>INA refers to ice nucleation activity of suspensions of cells via immersion freezing. The reported values are the freezing onset temperature. INA is considered positive when the onset of freezing occurred at temperatures  $\geq -8^{\circ}\text{C}$ . According to the reference:

- a- This study,  $10^8$  cells per mL in 0,9 % NaCl, 200  $\mu\text{L}$  per unit analysed, corresponding to  $\sim 2 \cdot 10^7$  cells.
- b-  $10^7$  cells per reaction in water, References:  
Amato, P., Parazols, M., Sancelme, M., Laj, P., Mailhot, G., and Delort, A. M.: Microorganisms isolated from the water phase of tropospheric clouds at the Puy de Dôme: major groups and growth abilities at low temperatures, FEMS Microbiol. Ecol., 59, 242-254, doi:10.1111/j.1574-6941.2006.00199.x, 2007;  
Joly, M., Attard, E., Sancelme, M., Deguillaume, L., Guilbaud, C., Morris, C. E., Amato, P., and Delort, A. M.: Ice nucleation activity of bacteria isolated from cloud water, Atmos. Environ., 70, 392-400, doi:10.1016/j.atmosenv.2013.01.027, 2013;  
Väitilingom, M., Attard, E., Gaiani, N., Sancelme, M., Deguillaume, L., Flossmann, A. I., Amato, P., and Delort, A. M.: Long-term features of cloud microbiology at the Puy de Dôme (France), Atmos. Environ., 58, 88-100, doi:10.1016/j.atmosenv.2012.03.072, 2012.
- c-  $10^6$  cells per reaction in water, Reference:  
Berge, O., Monteil, C. L., Bartoli, C., Chandeysson, C., Guilbaud, C., Sands, D. C., and Morris, C. E.: A user's guide to a data base of the diversity of *Pseudomonas syringae* and its application to classifying strains in this phylogenetic complex, PloS one, 9, e105547, doi: 10.1371/journal.pone.0105547, 2014.

<sup>2</sup>Capacity to induce a hypersensitive reaction (HR) in tobacco indicative of the presence of a functional type III secretion system that is one of the fundamental traits usually required for pathogenicity of *P. syringae* to plants.

**Supplemental Table 1.** This table contains all most relevant field data collected at Jungfraujoch and reported in the paper.  $f_v$  represents the fraction of residual water vapour in a precipitating air mass. More details on the calculation of all these parameters are reported at the Methods section in the article.

| Date of start sampling | Start sampling (UTC) | End sampling (UTC) | Total bacteria (cells mL <sup>-1</sup> ) | fraction living | INPs <sub>8</sub> mL <sup>-1</sup> | $f_v$ | Wind speed (km h <sup>-1</sup> ) | Temperature (°C) | <i>Pseudomonas syringae</i> (CFU L <sup>-1</sup> ) |
|------------------------|----------------------|--------------------|------------------------------------------|-----------------|------------------------------------|-------|----------------------------------|------------------|----------------------------------------------------|
| 10.03.2013             | 23.00 h              | 06.00 h            | 5285                                     |                 | 0.21                               | 0.27  | 13.0                             | -13.6            |                                                    |
| 11.03.2013             | 07.00 h              | 11.00 h            | 7689                                     | 0.78            | 0.21                               | 0.25  | 10.3                             | -12.7            |                                                    |
| 12.03.2013             | 06.00 h              | 09.30 h            | 22817                                    |                 | 0.21                               | 0.16  | 6.7                              | -13.1            |                                                    |
| 12.03.2013             | 16.00 h              | 18.00 h            | 10383                                    | 0.74            | 2.35                               | 0.22  | 11.7                             | -14.1            |                                                    |
| 13.03.2103             | 21.00 h              | 05.00 h            | 9326                                     | 0.52            | 1.35                               | 0.10  | 23.8                             | -22.4            |                                                    |
| 14.03.2013             | 05.00 h              | 08.00 h            | 7461                                     | 0.54            | 2.09                               | 0.09  | 38.7                             | -24.3            |                                                    |
| 19.04.2013             | 11.40 h              | 13.40 h            | 8082                                     | 0.69            | 1.59                               | 0.47  | 19.1                             | -6.2             |                                                    |
| 19.04.2013             | 13.40 h              | 15.30 h            | 7772                                     | 0.48            | 0.21                               | 0.35  | 13.7                             | -7.1             |                                                    |
| 19.04.2013             | 15.30 h              | 18.00 h            | 4974                                     | 0.56            | 3.16                               | 0.28  | 21.6                             | -10.9            |                                                    |
| 19.04.2013             | 21.30 h              | 04.00 h            | 9948                                     | 0.56            | 0.21                               | 0.32  | 14.4                             | -11.6            |                                                    |
| 20.04.2013             | 04.30 h              | 10.30 h            | 10258                                    | 0.52            | 8.06                               | 0.33  | 56.2                             | -10.0            |                                                    |
| 20.04.2013             | 10.30 h              | 14.30 h            | 9637                                     | 0.61            | 0.65                               | 0.28  | 48.6                             | -8.5             |                                                    |
| 20.04.2013             | 14.30 h              | 17.30 h            | 10258                                    | 0.61            | 1.35                               | 0.27  | 40.7                             | -8.1             |                                                    |
| 22.05.2013             | 13.45 h              | 15.30 h            | 7927                                     | 0.61            | 0.65                               | 0.30  | 31.3                             | -9.3             |                                                    |
| 22.05.2013             | 15.30 h              | 17.15 h            | 4197                                     | 0.63            | 1.35                               | 0.32  | 33.7                             | -9.9             |                                                    |
| 22.05.2013             | 21.00 h              | 01.00 h            | 4507                                     | 0.55            | 1.11                               | 0.29  | 28.0                             | -11.3            |                                                    |
| 23.05.2013             | 12.30 h              | 15.15 h            | 12124                                    |                 | 18.14                              | 0.38  | 15.8                             | -11.1            |                                                    |
| 23.05.2013             | 16.15 h              | 17.45 h            | 5595                                     | 0.64            | 0.65                               | 0.30  | 19.4                             | -11.5            |                                                    |
| 23.05.2013             | 20.45 h              | 04.00 h            | 4974                                     | 0.75            | 1.35                               | 0.26  | 27.7                             | -16.3            |                                                    |
| 24.05.2013             | 04.00 h              | 06.00h             | 6528                                     | 0.64            | 0.88                               | 0.21  | 29.5                             | -17.2            |                                                    |
| 20.06.2013             | 01.00 h              | 04.00 h            | 67301                                    | 0.66            | 113.92                             | 0.67  | 66.3                             | 0.3              |                                                    |
| 20.06.2103             | 04.00 h              | 08.00 h            | 66679                                    | 0.55            | 68.09                              | 0.55  | 61.9                             | -0.1             |                                                    |
| 20.06.2013             | 11.00 h              | 13.30 h            | 34972                                    | 0.67            | 182.55                             | 0.46  | 75.2                             | -0.8             |                                                    |
| 20.06.2013             | 15.30 h              | 17.30 h            | 23081                                    | 0.35            | 72.09                              | 0.48  | 74.8                             | -1.5             |                                                    |
| 20.06.2013             | 19.30 h              | 02.00 h            | 22460                                    | 0.45            | 16.13                              | 0.53  | 40.2                             | -1.0             |                                                    |
| 07.08.2013             | 12.00 h              | 14.00 h            | 53312                                    | 0.63            | 122.98                             | 0.78  | 59.8                             | 0.4              |                                                    |
| 07.08.2013             | 14.00 h              | 16.10 h            | 67612                                    | 0.59            | 68.09                              | 0.63  | 65.7                             | 0.1              |                                                    |
| 07.08.2013             | 16.10 h              | 19.20 h            | 43365                                    | 0.56            | 434.64                             | 0.63  | 76.3                             | -0.2             |                                                    |
| 07.08.2013             | 20.30 h              | 04.00 h            | 32174                                    | 0.63            | 37.44                              | 0.54  | 60.0                             | 0.2              |                                                    |
| 08.08.2013             | 06.30 h              | 09.30 h            | 7772                                     | 0.40            | 7.21                               | 0.47  | 30.3                             | 0.4              |                                                    |
| 08.08.2013             | 11.00 h              | 15.00 h            | 13989                                    | 0.51            | 7.21                               | 0.43  | 33.6                             | -0.4             |                                                    |
| 08.08.2013             | 15.00 h              | 17.00 h            | 5751                                     | 0.70            | 4.04                               | 0.52  | 21.0                             | 0.2              |                                                    |
| 08.09.2013             | 02.00h               | 05.00 h            | 3264                                     | 0.55            | 2.35                               | 0.47  | 42.4                             | -0.8             |                                                    |
| 08.09.2013             | 12.00 h              | 14.00 h            | 3109                                     | 0.58            | 6.39                               | 0.52  | 27.6                             | -0.1             |                                                    |
| 08.09.2013             | 14.00 h              | 15.15 h            | 3886                                     | 0.48            | 3.86                               | 0.49  | 16.0                             | -0.4             |                                                    |

|            |         |         |       |      |       |      |      |       |         |
|------------|---------|---------|-------|------|-------|------|------|-------|---------|
| 08.09.2013 | 15.15 h | 16.45 h | 4041  | 0.54 | 32.16 | 0.49 | 11.6 | -0.5  |         |
| 08.09.2013 | 18.30 h | 04.00 h | 2953  | 0.63 | 3.96  | 0.26 | 16.0 | -3.2  |         |
| 12.09.2013 | 10.50 h | 13.50 h | 3264  | 0.62 | 1.84  | 0.48 | 17.1 | -7.7  |         |
| 12.09.2013 | 13.50 h | 15.40 h | 2642  | 0.65 | 2.09  | 0.39 | 14.0 | -7.5  |         |
| 12.09.2013 | 15.40 h | 17.00 h | 2953  | 0.63 | 1.59  | 0.33 | 17.1 | -7.6  |         |
| 12.09.2013 | 19.30 h | 01.00 h | 2875  | 0.54 | 2.89  | 0.34 | 19.8 | -9.2  |         |
|            |         |         |       |      |       |      |      |       |         |
| 22.05.2014 | 4.00h   | 12.00h  | 52691 | 0.74 | 44.48 | 0.72 | 65.8 | -3.2  | under 2 |
| 22.05.2014 | 12.00 h | 20.00 h | 17874 | 0.69 | 12.01 | 0.49 | 55.3 | -2.8  | 2       |
| 22.05.2014 | 20.00h  | 4.00h   | 15388 | 0.60 | 31.51 | 0.52 | 58.7 | -5.1  | 4       |
| 28.06.2014 | 20.00h  | 4.00h   | 5285  | 0.53 | 5.00  | 0.47 | 26.2 | -1.1  | under 2 |
| 29.06.2014 | 4.00h   | 10.00h  | 3109  | 0.70 | 0.21  | 0.32 | 19.6 | -1.8  | under 2 |
| 29.06.2014 | 10.00h  | 16.00h  | 5595  | 0.56 | 6.29  | 0.36 | 14.6 | -2.8  | under 2 |
| 29.06.2014 | 18.00h  | 4.00h   | 2642  | 0.76 | 2.35  | 0.29 | 34.3 | -7.4  | under 2 |
| 29.07.2014 | 4.00h   | 10.00h  | 5751  | 0.70 | 0.43  | 0.23 | 26.2 | -2.0  | under 2 |
| 29.07.2014 | 11.00h  | 15.30h  | 4041  | 0.77 | 1.59  | 0.31 | 28.6 | -1.6  | under 2 |
| 30.07.2014 | 4.00h   | 12.00h  | 29998 | 0.55 | 0.88  | 0.34 | 33.0 | -0.4  | under 2 |
| 30.07.2014 | 17.00h  | 01.00h  | 7305  | 0.55 | 0.88  | 0.30 | 5.4  | 3.2   | under 2 |
| 30.09.2014 | 13.00h  | 13.45h  | 3575  |      | 0.21  | 0.41 | 7.6  | -1.2  |         |
| 01.10.2014 | 5.00h   | 6.30h   | 2409  | 0.45 | 1.59  | 0.38 | 17.0 | -2.5  |         |
| 21.10.2014 | 20.00h  | 4.00h   | 9948  | 0.61 | 60.51 | 0.39 | 68.0 | -12.8 | 45      |
| 22.10.2014 | 6.00h   | 13.00h  | 6839  | 0.48 | 29.02 | 0.29 | 60.4 | -17.0 | under 2 |
