# Supplementary material for: Ice nucleators have shorter persistence in the atmosphere thanother airborne bacteria
Source: Copernicus journal article supplement (doi:10.5194/bg-2016-496), 2016-11-24
Supplement: Supplementary file 1 [file cts_gene_sequences.xlsx]

## Sheet: Feuil1
This file constitutes a temporary repository of the cts sequences employed in the phylogenetic analysis of P. syringae.
We are currently organising an online repository of the sequences; its link will be added to the manuscript upon acceptance for publication.
Strain	Date	Phylogroup1	INA2	HR3	cts sequence
JFJ-0007	22 May 2014	2	-4.2	+	GTCGAGCTGCCAATTCTGACCGGTACAGTGGGTCCGGACGTGATCGACGTACGCGGCCTGACCGCCACCGGCCGCTTCACATTTGACCCTGGTTTCATGTCCACGGCCTCTTGCGATTCGAAGATCACCTACATCGATGGTGATAATGGCATTCTGCTACACCGCGGCTACCCGATCGAACAACTGGCCGAGCAGTCCGACTATCTCGAAACCTGCTACCTGCTGCTCAACGGTGAACTGCCCACCGCCGAGCAGAAAGCCCAGTTCGTGGCCGTGGTCAAGAACCACACGATGGTTCACGAACAGCTCAAGACCTTTTTCAACGGTTTCCGCCGCGACGCCCACCCGATGGCCGTCATGTGTGGCGTAGTCGGCGCCCTGTCAGCGTTCTACCACGAC…
JFJ-0008	22-23 May 2014	3	-	-	GTCGAGCTGCCAATTCTGACCGGTACAGTGGGTCCGGACGTGATCGACGTACGCGGCCTGACCGCCACCGGCCGCTTCACATTTGACCCTGGCTTCATGTCCACGGCCTCTTGCGATTCGAAGATCACCTACATTGATGGTGACAATGGCATTCTGCTGCACCGCGGCTACCCGATCGAACAACTGGCCGAGCAGTCCGATTACCTCGAAACCTGCTACCTGCTGCTCAACGGCGAACTGCCGACCGCCGAACAGAAAGCCCAGTTCGTGGCCGTGGTCAAGAACCACACGATGGTTCACGAGCAACTCAAGACCTTCTTCAACGGCTTTCGTCGCGACGCCCACCCGATGGCCGTCATGTGCGGCGTAGTCGGTGCCCTGTCAGCGTTCTACCACGAC…
JFJ-0011	22-23 May 2014	5	-3.7	+	GTCGAGCTGCCAATTCTGACGGGTACAGTCGGTCCGGACGTGATCGACGTACGCGGTCTTACCGCCACCGGCCGCTTCACATTTGACCCTGGCTTCATGTCCACGGCATCTTGCGAGTCGAAGATCACCTACATCGATGGTGATAACGGAATCCTGCTTCACCGCGGCTACCCGATCGAGCAACTGGCAGAGCAGTCCGATTACCTGGAAACCTGCTACCTGCTGCTCAATGGCGAACTGCCGACTGCCGAGCAGAAAGCCCAGTTCGTCGCCGTGGTCAAGAACCACACAATGGTTCACGAACAGCTCAAGACCTTTTTCAACGGTTTCCGCCGTGATGCCCACCCGATGGCCGTCATGTGTGGCGTCGTCGGCGCCCTGTCGGCGTTCTATCACGAC…
JFJ-0039	21-22 Oct 2014	1	-	+	GCCCCCGTCGAGCTGCCAATACTGACCGGTACAGTGGGTCCGGACGTGATCGACGTACGCGGTCTGACCGCCACCGGCCGCTTCACATTTGACCCTGGTTTCATGTCCACGGCCTCTTGCGAGTCGAAGATCACCTACATCGACGGTGACAACGGAATTCTGCTGCACCGCGGCTACCCGATCGAACAACTGGCCGAGCAGTCCGATTACCTCGAGACCTGCTACCTGTTGCTCAACGGCGAGCTGCCAACCGCCGAACAGAAAGCCCAGTTCGTGGCCGTGGTCAAGAACCACACAATGGTTCACGAACAACTCAAGACTTTCTTCAACGGCTTTCGCCGTGACGCCCACCCGATGGCCGTCATGTGCGGTGTAGTCGGCGCCCTGTCGGCGTTCTAC…
JFJ-0045	21-22 Oct 2014	1	-	+	GCCCCCGTCGAGCTGCCAATACTGACCGGTACAGTGGGCCCGGACGTGATCGACGTACGCGGTCTGACCGCCACCGGCCGCTTCACATTTGACCCTGGTTTCATGTCCACGGCCTCTTGCGAGTCGAAGATCACCTACATCGATGGTGACAACGGAATTCTGCTGCACCGCGGCTACCCGATCGAACAACTGGCCGAGCAGTCCGATTACCTCGAGACCTGCTACCTGTTGCTCAACGGCGAGCTGCCAACCGCCGAACAGAAAGCCCAGTTCGTGGCCGTGGTCAAGAACCACACAATGGTTCACGAACAACTCAAGACCTTCTTCAACGGCTTTCGCCGTGACGCCCACCCGATGGCCGTCATGTGCGGTGTAGTCGGCGCCCTGTCGGCGTTCTAC…
JFJ-0048	21-22 Oct 2014	1	-	+	CCCGTCGAGCTGCCAATACTGACCGGTACAGTGGGTCCGGACGTGATCGACGTACGCGGTCTGACCGCCACCGGCCGCTTCACATTTGACCCTGGCTTCATGTCCACGGCCTCTTGCGAGTCGAAGATCACCTACATCGATGGTGACAACGGAATTCTGCTGCACCGCGGCTACCCTATCGAACAACTGGCCGAGCAGTCCGATTACCTCGAGACCTGCTACCTGCTGCTCAACGGCGAGCTGCCAACCGCCGAACAGAAAGCCCAGTTCGTGGCCGTGGTCAAGAACCACACGATGGTTCATGAACAACTCAAGACCTTCTTCAACGGCTTTCGCCGTGACGCCCACCCGATGGCCGTCATGTGCGGTGTAGTCGGCGCGCTGTCGGCGTTCTACCAC…
JFJ-0061	21-22 Oct 2014	1	-	+	GCCCCCGTCGAGCTGCCAATACTGACCGGTACAGTGGGCCCGGACGTGATCGACGTACGCGGTCTGACCGCCACCGGCCGCTTCACATTTGACCCTGGTTTCATGTCCACGGCCTCTTGCGAGTCGAAGATCACCTACATCGATGGTGACAACGGAATTCTGCTGCACCGCGGCTACCCGATCGAACAACTGGCCGAGCAGTCCGATTACCTCGAGACCTGCTACCTGTTGCTCAACGGCGAGCTGCCAACCGCCGAACAGAAAGCCCAGTTCGTGGCCGTGGTCAAGAACCACACAATGGTTCACGAACAACTCAAGACTTTCTTCAACGGCTTTCGCCGTGACGCCCACCCGATGGCCGTCATGTGCGGTGTAGTCGGCGCCCTGTCGGCGTTCTAC…
JFJ-0043	21-22 Oct 2014	2	-2.6	+	GCCCCCGTCGAGCTGCCAATTCTGACCGGTACAGTGGGTCCGGACGTGATCGACGTACGCGGCCTGACCGCCACCGGCCGCTTCACATTTGACCCTGGTTTCATGTCCACGGCCTCTTGCGATTCGAAGATCACCTACATCGATGGTGATAATGGCATTCTGCTACACCGCGGCTACCCGATCGAACAACTGGCCGAGCAGTCCGACTATCTCGAAACCTGCTACCTGCTGCTCAACGGTGAACTGCCCACCGCCGAGCAGAAAGCCCAGTTCGTGGCCGTGGTCAAGAACCACACGATGGTTCACGAACAGCTCAAGACCTTTTTCAACGGTTTCCGCCGCGACGCCCACCCGATGGCCGTCATGTGTGGCGTAGTCGGCGCCCTGTCAGCGTTCTAC…
JFJ-0047	21-22 Oct 2014	2	-	-	GCCCCCGTCGAGCTGCCAATTCTGACCGGTACAGTGGGTCCGGACGTGATCGACGTACGCGGCCTGACCGCCACCGGCCGCTTCACATTTGACCCTGGCTTCATGTCCACGGCCTCTTGCGATTCGAAGATCACCTACATCGATGGTGATAATGGCATTCTGTTGCACCGCGGCTACCCGATCGAACAACTGGCCGAGCAGTCCGACTACCTGGAAACCTGCTACCTGCTGCTCAACGGCGAACTGCCCACCGCCGAGCAGAAAGCCCAGTTCGTGGCCGTGGTCAAGAACCACACGATGGTTCACGAACAGCTCAAGACCTTTTTCAACGGTTTCCGCCGTGACGCCCACCCGATGGCCGTCATGTGTGGTGTAGTCGGCGCCCTGTCAGCGTTCTAC…
JFJ-0050	21-22 Oct 2014	2	-3.6	+	GCCCCCGTCGAGCTGCCAATTCTGACCGGTACAGTGGGTCCGGACGTGATCGACGTACGCGGCCTGACCGCCACCGGCCGCTTCACATTTGACCCTGGTTTCATGTCCACGGCCTCTTGCGATTCGAAGATCACCTACATCGATGGTGATAATGGCATTCTGCTACACCGCGGCTACCCGATCGAACAACTGGCCGAGCAGTCCGACTATCTCGAAACCTGCTACCTGCTGCTCAACGGTGAACTGCCCACCGCCGAGCAAAAAGCCCAGTTCGTGGCCGTGGTCAAGAACCACACGATGGTTCACGAACAGCTCAAGACCTTTTTCAACGGCTTCCGCCGCGACGCCCACCCGATGGCCGTCATGTGTGGCGTAGTCGGCGCCCTGTCAGCGTTCTAC…
JFJ-0052	21-22 Oct 2014	2	-2.7	+	GTCGAGCTGCCAATTCTGACCGGTACAGTGGGTCCGGACGTGATCGACGTACGCGGCCTGACCGCCACCGGCCGCTTCACATTTGACCCTGGTTTCATGTCCACGGCCTCTTGCGATTCGAAGATCACCTACATTGATGGTGATAATGGCATTCTGCTACACCGCGGCTACCCGATCGAACAACTGGCCGAGCAGTCCGACTATCTCGAAACCTGCTACCTGCTGCTCAACGGTGAACTGCCCACCGCCGAGCAGAAAGCCCAGTTCGTGGCCGTGGTCAAGAACCACACGATGGTTCACGAACAGCTCAAGACCTTTTTCAACGGCTTCCGCCGCGACGCCCACCCGATGGCCGTCATGTGTGGCGTAGTCGGCGCCCTGTCAGCGTTCTACCACGAC…
JFJ-0054	21-22 Oct 2014	2	-2.2	+	GTCGAGCTGCCAATTCTGACCGGTACAGTGGGTCCGGACGTGATCGACGTACGCGGCCTGACCGCCACCGGCCGCTTCACATTTGACCCTGGTTTCATGTCCACGGCCTCTTGCGATTCGAAGATCACCTACATTGATGGTGATAATGGCATTCTGCTACACCGCGGCTACCCGATCGAACAACTGGCCGAGCAGTCCGACTATCTCGAAACCTGCTACCTGCTGCTCAACGGTGAACTGCCCACCGCCGAGCAGAAAGCCCAGTTCGTGGCCGTGGTCAAGAACCACACGATGGTTCACGAACAGCTCAAGACCTTTTTCAACGGCTTCCGCCGCGACGCCCACCCGATGGCCGTCATGTGTGGCGTAGTCGGCGCCCTGTCAGCGTTCTACCACGAC…
JFJ-0055	21-22 Oct 2014	2	-2.2	+	GCCCCCGTCGAGCTGCCAATTCTGACCGGTACAGTGGGTCCGGACGTGATCGACGTACGCGGCCTGACCGCCACCGGCCGCTTCACATTTGACCCTGGTTTCATGTCCACGGCCTCTTGCGATTCGAAGATCACCTACATCGATGGTGATAATGGCATTCTGCTACACCGCGGCTACCCGATCGAACAACTGGCCGAGCAGTCCGACTACCTCGAAACCTGCTACCTGCTGCTCAACGGTGAACTGCCCACCGCCGAGCAGAAAGCCCAGTTCGTGGCCGTGGTCAAGAACCACACGATGGTTCACGAACAGCTCAAGACCTTTTTCAACGGTTTCCGCCGCGACGCCCACCCGATGGCCGTCATGTGTGGCGTAGTCGGCGCCCTGTCAGCGTTCTAC…
JFJ-0058	21-22 Oct 2014	4	-	+	GCCCCCGTCGAGCTGCCAATTCTGACCGGTACAGTGGGTCCGGACGTGATCGACGTACGCGGACTGACCGCCACCGGCCGCTTCACATTTGACCCTGGCTTCATGTCCACGGCATCTTGCGAGTCGAAGATCACCTACATCGATGGTGACAACGGAATCCTGCTTCACCGCGGCTACCCTATCGAACAACTGGCCGAGCAGTCCGATTACCTCGAAACCTGTTACCTGCTGCTCAACGGCGAATTGCCGACCGCCGAACAGAAAGCCCAGTTTGTGGCCGTGGTCAAGAACCACACGATGGTTCACGAGCAACTCAAGACATTTTTCAACGGTTTCCGCCGCGATGCCCACCCGATGGCCGTCATGTGCGGCGTAGTCGGCGCCCTTTCTGCGTTCTAT…
JFJ-0056	21-22 Oct 2014	7	-2.9	+	GCCCCCGTCGAGCTGCCAATTCTGACCGGTACAGTGGGTCCGGACGTGATCGACGTACGCGGTCTCACCGCCACCGGCCGCTTCACATTCGACCCTGGCTTCATGTCGACCGCCTCTTGCGAGTCGAAGATCACCTACATCGATGGTGACAACGGAATCCTGCTGCACCGCGGCTACCCTATCGAACAACTGGCCCAGCACTCCGACTACCTGGAGACCTGCTACCTGCTGCTCAACGGCGAATTGCCGACCGCCGAGCAGAAAGCCCAGTTCGTCGCCGTGGTCAAGAACCACACGATGGTCCACGAACAGCTCAAGACCTTTTTCAACGGCTTCCGTCGCGACGCCCACCCGATGGCCGTCATGTGCGGCGTGGTCGGCGCGCTTTCAGCGTTTTAC…
JFJ-0059	21-22 Oct 2014	7	-4.9	+	GTCGAGCTGCCAATTCTGACCGGTACAGTGGGTCCGGACGTGATCGACGTACGCGGTCTCACCGCCACCGGCCGCTTCACATTCGACCCTGGCTTCATGTCGACCGCCTCTTGCGAGTCGAAGATCACCTACATCGATGGTGACAACGGAATCCTGCTGCACCGCGGCTACCCTATCGAACAACTGGCCCAGCACTCCGACTACCTGGAGACCTGCTACCTGCTGCTCAATGGCGAATTGCCGACCGCCGAGCAGAAAGCCCAGTTCGTCGCCGTGGTCAAGAACCACACGATGGTCCACGAACAGCTCAAGACCTTTTTCAACGGCTTCCGTCGCGACGCCCACCCGATGGCCGTCATGTGCGGCGTGGTCGGCGCGCTTTCAGCGTTCTACCACGAC…
JFJ-0040	21-22 Oct 2014	10	-4.2	+	GCCCCCGTCGAGCTGCCAATTCTGACGGGTACAGTGGGTCCGGACGTGATCGACGTACGCGGTCTCACCGCCACCGGCCGCTTCACATTTGACCCTGGCTTCATGTCCACGGCATCTTGCGAGTCGAAGATCACCTACATCGATGGTGATAACGGAATCCTGCTTCACCGCGGCTACCCGATCGAGCAACTGGCCGAGCAGTCCGACTATCTGGAAACCTGCTACCTGCTGCTCAATGGCGAACTGCCAACTGCCGAGCAGAAAGCCCAGTTCGTTGCCGTGGTCAAGAACCACACGATGGTTCACGAACAGCTCAAGACCTTTTTCAACGGCTTCCGCCGTGATGCCCACCCGATGGCCGTCATGTGCGGCGTGGTCGGGGCCCTGTCGGCGTTCTAT…
JFJ-0044	21-22 Oct 2014	10	-2.1	+	GCCCCCGTCGAGCTGCCAATTCTGACGGGTACAGTGGGTCCGGACGTGATCGACGTACGCGGTCTCACCGCCACCGGCCGCTTCACATTTGACCCTGGCTTCATGTCCACGGCATCTTGCGAGTCGAAGATCACCTACATCGATGGTGATAACGGAATTCTGCTTCACCGCGGCTACCCGATCGAACAACTGGCCGAGCAGTCCGATTATCTGGAAACCTGCTACCTGCTGCTCAATGGCGAATTGCCAACCGCCGAGCAGAAAGCCCAGTTCGTTGCCGTGGTCAAAAACCACACGATGGTTCACGAACAGCTCAAGACCTTTTTCAACGGTTTCCGCCGTGATGCCCACCCGATGGCCGTCATGTGCGGCGTAGTCGGCGCCCTGTCGGCGTTCTAT…
JFJ-0049	21-22 Oct 2014	10	-2.8	+	GCCCCCGTCGAGCTGCCAATTCTGACGGGTACAGTGGGTCCGGACGTGATCGACGTACGCGGTCTCACCGCCACCGGCCGCTTCACATTTGACCCTGGCTTCATGTCCACGGCATCTTGCGAGTCGAAGATCACCTACATCGATGGTGATAACGGAATTCTGCTTCACCGCGGCTACCCGATCGAACAACTGGCCGAGCAGTCCGATTATCTGGAAACCTGCTACCTGCTGCTCAATGGCGAATTGCCAACCGCCGAGCAGAAAGCCCAGTTCGTTGCCGTGGTCAAAAACCACACGATGGTTCACGAACAGCTCAAGACCTTTTTCAACGGTTTCCGCCGTGATGCCCACCCGATGGCCGTCATGTGCGGCGTAGTCGGCGCCCTGTCGGCGTTCTAT…
JFJ-0051	21-22 Oct 2014	10	-2.9	+	GCCCCCGTCGAGCTGCCAATTCTGACGGGTACAGTGGGTCCGGACGTGATCGACGTACGCGGTCTCACCGCCACCGGCCGCTTCACATTTGACCCTGGCTTCATGTCCACGGCATCTTGCGAGTCGAAGATCACCTACATCGATGGTGATAACGGAATCCTGCTTCACCGCGGCTACCCGATCGAGCAACTGGCCGAGCAGTCCGATTATCTGGAAACCTGCTACCTGCTGCTCAATGGCGAACTGCCAACTGCCGAGCAGAAAGCCCAGTTCGTTGCCGTGGTCAAGAACCACACGATGGTTCACGAACAGCTCAAGACCTTTTTCAACGGCTTCCGCCGTGATGCCCACCCGATGGCCGTCATGTGCGGCGTGGTCGGTGCCCTGTCGGCGTTCTAT…
JFJ-0053	21-22 Oct 2014	10	-4.0	+	GCCCCCGTCGAGCTGCCAATTCTGACGGGTACAGTGGGTCCGGACGTGATCGACGTACGCGGTCTCACCGCCACCGGCCGCTTCACATTTGACCCTGGCTTCATGTCCACGGCATCTTGCGAGTCGAAGATCACCTACATCGATGGTGATAACGGAATCCTGCTTCACCGCGGCTACCCGATCGAGCAACTGGCCGAGCAGTCCGATTATCTGGAAACCTGCTACCTGCTGCTCAATGGCGAACTGCCAACTGCCGAGCAGAAAGCCCAGTTCGTTGCCGTGGTCAAGAACCACACGATGGTTCACGAACAGCTCAAGACCTTTTTCAACGGCTTCCGCCGTGATGCCCACCCGATGGCCGTCATGTGCGGCGTGGTCGGTGCCCTGTCGGCGTTCTAT…
JFJ-0060	21-22 Oct 2014	10	-2.8	+	GTCGAGCTGCCAATTCTGACGGGTACAGTGGGTCCGGACGTGATCGACGTACGCGGTCTCACCGCCACCGGCCGCTTCACATTTGACCCTGGCTTCATGTCCACGGCATCTTGCGAGTCGAAGATCACCTACATCGACGGTGATAACGGAATCCTGCTTCACCGCGGCTACCCGATCGAACAACTGGCCGAGCAGTCCGATTACCTGGAAACCTGCTACCTGTTGCTCAATGGCGAATTGCCAACTGCCGAGCAGAAAGCCCAGTTCGTTGCCGTGGTCAAGAACCACACGATGGTTCACGAACAGCTCAAGACCTTTTTCAACGGCTTCCGCCGTGATGCCCACCCGATGGCCGTCATGTGCGGCGTAGTCGGCGCCCTTTCGGCGTTCTATCACGAC…
JFJ-0046	21-22 Oct 2014	13	-	-	GCCCCCGTCGAGCTGCCCATTCTGACCGGCACCGTAGGCCCCGACGTGATCGACGTACGCGGTCTCACAGCCACAGGCCGCTTCACATTCGACCCAGGCTTCATGTCGACCGCCTCTTGCGAATCGAAGATCACCTACATTGATGGTGACAACGGGATCCTGCTGCACCGCGGCTACCCGATCGAACAACTGGCCGAGCAGTCGGACTACCTGGAAACCTGCTACCTGCTGCTCAACGGTGAACTGCCAACCGCCGAGCAGAAAGCCCAGTTCGTTGTTGTCGTGAAGAACCACACCATGGTTCACGAACAGCTCAAGACCTTTTTCAACGGCTTCCGCCGCGACGCTCACCCGATGGCGGTGATGTGTGGTGTGGTGGGTGCCCTTTCCGCGTTCTAT…
JFJ-0057	21-22 Oct 2014	13	-	+	GTCGAGCTGCCCATTCTGACCGGCACCGTAGGCCCCGACGTGATCGACGTACGCGGTCTCACAGCCACCGGCCGCTTCACATTCGACCCAGGCTTCATGTCGACCGCCTCTTGCGAATCGAAGATCACCTACATCGATGGTGACAACGGGATCCTGCTGCACCGCGGCTATCCGATCGAACAACTGGCCGAGCAGTCGGACTACCTGGAAACCTGCTATCTGCTGCTGAACGGCGAACTGCCAACCGCCGAGCAGAAAGCCCAGTTCGTTGTTGTCGTGAAAAACCACACCATGGTTCACGAACAGCTCAAGACCTTCTTCAACGGCTTCCGCCGCGACGCTCACCCGATGGCGGTGATGTGTGGTGTGGTGGGTGCCCTTTCCGCGTTCTATCACGAC…
